# Supplementary material for: Between Resilience and Agency: A Systematic Review of Protective Factors and Positive Experiences of LGBTQ+ Students
Source: MDPI journal article supplement (doi:10.3390/healthcare11142098), 2023-07-23
Supplement: s1 [file s1]

**Table S1.** Data collection table

| First author/year               | Title                                                                                                                                                            | Location               | N LGBTQ+ students (age >14<19)                                 | Methodology                                                           |
|---------------------------------|------------------------------------------------------------------------------------------------------------------------------------------------------------------|------------------------|----------------------------------------------------------------|-----------------------------------------------------------------------|
| Arnarsson et al., 2015          | Suicidal risk and sexual orientation in adolescence: A population-based study in Iceland                                                                         | Iceland                | 57 lesbian, gay and bisexual (LGB)                             | Survey<br>Quantitative analysis                                       |
| Colvin et al., 2019             | School climate & sexual and gender minority adolescent mental health                                                                                             | USA                    | 240 sexual/gender minority (SGM)                               | Survey<br>Quantitative analysis                                       |
| Craig et al., 2014              | School-based groups to support multiethnic sexual minority youth resiliency: Preliminary effectiveness                                                           | Canada                 | 263 sexual minority (SM)                                       | Quantitative analysis/Pretest and posttest programme assessment       |
| Day et al., 2019                | Safe and supportive schools for LGBT youth: Addressing educational inequities through inclusive policies and practices                                           | USA                    | 5598 LGB and 1362 trans (T)                                    | Quantitative analysis (students and principals' reports)              |
| De Pedro et al., 2017           | School protective factors and substance use among lesbian, gay, and bisexual adolescents in California public schools                                            | USA                    | 21,953 LGB                                                     | Survey<br>Quantitative analysis                                       |
| Eisenberg et al., 2017          | Risk and protective factors in the lives of transgender/gender nonconforming adolescents                                                                         | USA                    | 2,168 T and gender non-conforming                              | Survey<br>Quantitative analysis                                       |
| Eisenberg et al., 2019          | Emotional distress, bullying victimization, and protective factors among transgender and gender diverse adolescents in city, suburban, town, and rural locations | USA                    | 2,168 TGD                                                      | Survey<br>Quantitative analysis (covariance models)                   |
| Erhard et al., 2016             | The schooling experience of lesbian, gay, and bisexual youth in Israel: Falling below and rising above as a matter of social ecology                             | Israel                 | 20 LGB                                                         | Interviews<br>Exploratory research<br>Qualitative (thematic analysis) |
| Evans et al., 2021              | It was just one less thing that I had to worry about': Positive experiences of schooling for gender diverse and transgender students                             | Australia              | 3 T                                                            | Interviews<br>Qualitative analysis                                    |
| Francis et al., 2020            | Troubling the discourse of the victimization of queer youth in Icelandic and South African education                                                             | Iceland & South Africa | 38 queer (Q) (19 from Iceland, 19 from South Africa)           | In-depth interviews<br>Qualitative analysis                           |
| Freitas et al., 2017            | Mecanismos de proteção perante a vitimização por pares e a discriminação                                                                                         | Portugal               | 84 LGB                                                         | Survey<br>Quantitative analysis                                       |
| Gower et al., 2018              | School practices to foster LGBT-supportive climate: Associations with adolescent bullying involvement                                                            | USA                    | 1931 LGBQ                                                      | Mixed method<br>Quantitative analysis<br>Reports analysis             |
| Gower et al., 2018 <sup>2</sup> | Supporting transgender and gender diverse youth: Protection against emotional distress and substance use                                                         | USA                    | 2,168 T, genderqueer, genderfluid, or questioning their gender | Survey<br>Quantitative data                                           |
| Greytak et al., 2013            | Putting the 'T' in 'resource': The benefits of LGBT-related school resources for transgender youth                                                               | USA                    | 6,174 LGB and 409 T                                            | Survey<br>Quantitative analysis                                       |
| Higa et al., 2014               | Negative and positive factors associated with the well-being of lesbian, gay, bisexual, transgender, queer, and questioning (LGBTQ) youth                        | USA                    | 68 LGBTQ                                                       | Focus groups<br>Interviews<br>Qualitative analysis                    |
| Hillier et al., 2019            | Risk, resilience, resistance and situated agency of trans high school students                                                                                   | USA                    | 22 T                                                           | Interviews<br>Qualitative<br>Thematic analysis                        |

|                        |                                                                                                                                                                                     |              |                                  |                                                                           |
|------------------------|-------------------------------------------------------------------------------------------------------------------------------------------------------------------------------------|--------------|----------------------------------|---------------------------------------------------------------------------|
| Ioverno et al., 2016   | The protective role of gay–straight alliances for lesbian, gay, bisexual, and questioning students: A prospective analysis                                                          | USA          | 327 LGBQ                         | Quantitative analysis<br>Longitudinal data                                |
| Konishi et al., 2014   | Still a target: Sexual diversity and power of caring                                                                                                                                | Canada       | 810 LGB                          | Survey<br>Quantitative analysis                                           |
| Kosciw et al., 2015    | Reflecting resiliency: Openness about sexual orientation and/or gender identity and its relationship to well-being and educational outcomes for LGBT students                       | USA          | 7,816 LGBT                       | Survey<br>Quantitative analysis                                           |
| Leonard, 2022          | 'It was probably one of the best moments of being trans, honestly!': Exploring the positive school experiences of transgender children and young people                             | UK           | 3 T                              | Focus groups<br>Interviews<br>Interpretative Phenomenological Analysis    |
| Lessardet al., 2020    | Gay–straight alliances: A mechanism of health risk reduction among lesbian, gay, bisexual, transgender, and questioning adolescents                                                 | USA          | 17,112 LGBTQ                     | Survey<br>Quantitative analysis                                           |
| McCormack et al., 2012 | The positive experiences of openly gay, lesbian, bisexual and transgendered students in a christian sixth form college                                                              | UK           | 4 LGBT                           | Interviews<br>Etnographic participant observation<br>Qualitative analysis |
| McCormick et al., 2015 | Gay–straight alliances: Understanding their impact on the academic and social experiences of lesbian, gay, bisexual, transgender, and questioning high school students              | USA          | 36 LGBTQ                         | Interviews<br>Qualitative analysis                                        |
| McGowan et al., 2022   | Living your truth: Views and experiences of transgender young people in secondary education                                                                                         | Scotland     | 10 T                             | Interviews<br>Qualitative<br>Thematic analysis                            |
| McKay et al., 2019     | Suicide etiology in youth: Differences and similarities by sexual and gender minority status                                                                                        | USA          | 175 SGM                          | Quantitative analysis<br>Secondary data                                   |
| Mintz et al., 2021     | Supporting sexual minority youth: Protective factors of adverse health outcomes and implications for public health                                                                  | USA          | 580 LGBQ                         | Survey (across four semesters)<br>Quantitative analysis                   |
| Morris et al., 2014    | The changing experiences of bisexual male adolescents                                                                                                                               | UK           | 15 male B                        | Interviews<br>Critical interpretative approach<br>Qualitative analysis    |
| Msibi 2012             | I'm used to it now': Experiences of homophobia among queer youth in South African township schools                                                                                  | South Africa | 8 black LGQ                      | Life narratives interviews<br>Qualitative                                 |
| O'Brien et al., 2022   | Holding the space: Individual- and group-level factors predicting member retention in gender-sexuality alliances                                                                    | USA          | 340 SM                           | Quantitative survey data analysis                                         |
| Odenbring et al., 2021 | Trapped between: 'coming out' and forced to stay closeted                                                                                                                           | Sweden       | 1 female B                       | In-depth interviews with one key informant<br>Qualitative                 |
| Parmar et al., 2022    | Investigating protective factors associated with mental health outcomes in sexual minority youth                                                                                    | USA          | 1943 SMY                         | Survey Cohort study<br>Quantitative analysis                              |
| Phillips et al., 2020  | Engagement with LGBTQ community moderates the association between victimization and substance use among a cohort of sexual and gender minority individuals assigned female at birth | USA          | 400 SGM assigned female at birth | Survey<br>Quantitative analysis                                           |
| Poteat et al., 2015    | Contextualizing gay-straight alliances: Student, advisor, and structural factors related to positive youth development among members                                                | USA          | 146 GSA members                  | Survey<br>Quantitative analysis                                           |

|                               |                                                                                                                                                                                      |           |                                                                   |                                                             |
|-------------------------------|--------------------------------------------------------------------------------------------------------------------------------------------------------------------------------------|-----------|-------------------------------------------------------------------|-------------------------------------------------------------|
| Poteat et al., 2016           | Promoting youth agency through dimensions of gay–straight alliance involvement and conditions that maximize associations                                                             | USA       | 203 LGBTQ                                                         | Survey<br>Quantitative analysis                             |
| Poteat et al., 2018           | Gay-Straight Alliance involvement and youths' participation in civic engagement, advocacy, and awareness-raising                                                                     | USA       | 205 LGB (and 87 heterosexual) members of GSA                      | Survey<br>Quantitative analysis                             |
| Poteat et al., 2020           | Membership experiences in gender-sexuality alliances (GSAs) predict increased hope and attenuate the effects of victimization                                                        | USA       | 366 members of GSA                                                | Two wave survey<br>Quantitative analysis                    |
| Price et al., 2019            | Teacher relationships and adolescents experiencing identity-based victimization: What matters for whom among stigmatized adolescents                                                 | USA       | 216 SMY                                                           | Survey<br>Quantitative analysis                             |
| Proulx et al., 2019           | Associations of lesbian, gay, bisexual, transgender, and questioning–inclusive sex education with mental health outcomes and school-based victimization in U.S. high school students | USA       | 6,204 LGBTQ)                                                      | Survey<br>Quantitative analysis                             |
| Ross-Reed et al., 2019        | Family, school, and peer support are associated with rates of violence victimization and self-harm among gender minority and cisgender youth                                         | USA       | 1107 GM                                                           | Survey<br>Quantitative analysis                             |
| Russell et al., 2013          | Risk and protective factors for suicidal thoughts among sexual minority youth: Evidence from the add health study                                                                    | USA       | 916 SMY                                                           | Longitudinal study<br>Quantitative analysis                 |
| Russell et al., 2020          | Gender diversity and safety climate perceptions in schools and other youth-serving organisations                                                                                     | Australia | 27 gender diverse                                                 | Survey<br>Quantitative analysis                             |
| Schimmel-Bristow et al., 2018 | Youth and caregiver experiences of gender identity transition: A qualitative study                                                                                                   | USA       | 15 T                                                              | Interviews<br>Thematic analysis<br>Qualitative              |
| Schimmel-Bristow et al., 2019 | Youth and caregiver experiences of gender identity transition: A qualitative study                                                                                                   | USA       | 15 T                                                              | Interviews<br>Focus groups<br>Theoretical thematic analysis |
| Snapp et al., 2015            | Students' perspectives on LGBTQ-inclusive curriculum                                                                                                                                 | USA       | 26 GSA members                                                    | Focus groups<br>Qualitative                                 |
| Standley et al., 2021         | Intersectionality, social support, and youth suicidality: A socioecological approach to prevention                                                                                   | USA       | 718 SMY                                                           | Survey<br>Quantitative analysis                             |
| Szlyk et al., 2021            | Narratives of suicidality, alternative education, and resiliency: Implications for social work practice and research                                                                 | USA       | 1 T and 1 B                                                       | Interviews<br>Qualitative<br>Narrative analysis             |
| Taliaferro et al., 2018       | Connections that moderate risk of non-suicidal self-injury among transgender and gender non-conforming youth                                                                         | USA       | 2,168 TGNC (transgender and gender non conforming)                | Survey<br>Quantitative analysis                             |
| Taliaferro et al., 2019       | Risk and protective factors for self-harm in a population-based sample of transgender youth                                                                                          | USA       | 1,635 TGBC                                                        | Survey<br>Quantitative analysis                             |
| Toomey et al., 2013           | Gay-straight alliances, social justice involvement, and school victimization of Lesbian, gay, bisexual, and queer youth: Implications for school well-being and plans to vote        | USA       | 230 LGBTQ                                                         | Survey<br>Quantitative analysis                             |
| Toomey et al., 2016           | Mindfulness as a coping strategy for bias-based school victimization among Latina/o sexual minority youth                                                                            | USA       | 111 SM Latina/o SM                                                | Survey<br>Quantitative analysis                             |
| Toomey et al., 2018           | Coping with sexual orientation–related minority stress, USA 2018                                                                                                                     | USA       | 245 LGB (aged 21-25 years - it concerned their youth experiences) | Survey<br>Quantitative analysis                             |

|                         |                                                                                                                                  |                 |                                                                           |                                                                                                       |
|-------------------------|----------------------------------------------------------------------------------------------------------------------------------|-----------------|---------------------------------------------------------------------------|-------------------------------------------------------------------------------------------------------|
| Toomey et al., 2019     | Are developmental assets protective against suicidal behaviour? Differential associations by sexual orientation                  | USA             | 11,459 LGB                                                                | Survey<br>Quantitative analysis                                                                       |
| van Bergen et al., 2014 | 'Their words cut me like a knife': Coping responses of Dutch lesbian, gay and bisexual youth to stigma                           | The Netherlands | 30 LGB                                                                    | Interviews<br>Qualitative analysis                                                                    |
| Vigna et al., 2018      | Does self-compassion covary with minority stress? Examining group differences at the intersection of marginalized identities     | USA             | 396 SGM                                                                   | Survey<br>Quantitative analysis                                                                       |
| Watson et al., 2017     | Disordered eating behaviors among transgender youth: Probability profiles from risk and protective factors                       | Canada          | 323 T                                                                     | Survey<br>Quantitative analysis                                                                       |
| Watson et al., 2020     | Associations between community-level LGBTQ-supportive factors and substance use among sexual minority adolescents                | Canada          | 2678 SMY                                                                  | Survey<br>Community and school data<br>Quantitative analysis                                          |
| Wei et al., 2019        | Coming out in Mainland China: A national survey of LGBTQ students                                                                | China           | 132 LGBTQ                                                                 | Survey<br>Quantitative analysis                                                                       |
| Wernick et al., 2013    | LGBTQQ youth creating change: Developing allies against bullying through performance and dialogue                                | USA             | 137 LGBQ and 35 T/genderqueer members of middle and high school alliances | Pre and post-test surveys<br>Quantitative analysis                                                    |
| Wernick et al., 2014    | How theater within a transformative organizing framework cultivates individual and collective empowerment among LGBTQQ youth     | USA             | 8 LGBTQQ                                                                  | Interviews<br>Qualitative analysis                                                                    |
| Whitaker et al., 2016   | School-based protective factors related to suicide for lesbian, gay, and bisexual adolescents                                    | USA             | 356 LGB                                                                   | Survey<br>Quantitative analysis                                                                       |
| Wilkerson et al., 2017  | Social support, depression, self-esteem, and coping among LGBTQ adolescents participating in hatch youth                         | USA             | 108 LGBTQ                                                                 | Survey<br>Quantitative analysis                                                                       |
| Woolley et al., 2020    | Bisexuality, bad girls, and bullying                                                                                             | USA             | 2 female B and GSA members from one school                                | Ethnography (interviews, focus groups, classroom recordings)<br>Qualitative analysis                  |
| Yang et al., 2014       | Flower boys on campus: Performing and practicing masculinity                                                                     | Taiwan          | 8 'fem boys'                                                              | Ethnography (observations, focus groups, interviews, and document collection)<br>Qualitative analysis |
| Zeeman et al., 2017     | Promoting resilience and emotional well-being of transgender young people: Research at the intersections of gender and sexuality | UK              | 5 T                                                                       | Focus group<br>Thematic analysis<br>Qualitative                                                       |
